# Supplementary material
Source: publisher figshare collection journal article supplement (https://f1000.figshare.com/ndownloader/files/1577587)
Supplement: Supplementary file 1 [file 1577587]

Frame	Area	Mean	Min	Max	Perim.	Time	Normalized response	average initial baseline signal
1	0.15	22010.444	4861	56492	1.403	0.35	1.037670009	21211.41032
2	0.15	21913.066	4580	56517	1.403	0.7	1.033079178	each frame = 0.35s
3	0.15	21844.169	4492	56516	1.403	1.05	1.029831067
4	0.15	21811.236	4516	56492	1.403	1.4	1.02827846
5	0.15	21696.469	4392	56554	1.403	1.75	1.022867834
6	0.15	21601.953	4666	56520	1.403	2.1	1.01841193
7	0.15	21556.39	4428	56612	1.403	2.45	1.016263888
8	0.15	21467.074	4490	56535	1.403	2.8	1.012053136
9	0.15	21323.825	4438	56566	1.403	3.15	1.005299742
10	0.15	21268.35	4533	56508	1.403	3.5	1.002684404
11	0.15	21245.129	4547	56531	1.403	3.85	1.001589663
12	0.15	21230.75	4485	56579	1.403	4.2	1.000911773
13	0.15	21136.161	4312	56615	1.403	4.55	0.996452428
14	0.15	21094.849	4619	56559	1.403	4.9	0.994504797
15	0.15	21018.108	4351	56541	1.403	5.25	0.990886886
16	0.15	20892.314	4354	56518	1.403	5.6	0.984956398
17	0.15	20872.915	4437	56559	1.403	5.95	0.984041844
18	0.15	20793.788	4396	56561	1.403	6.3	0.980311446
19	0.15	20719.472	4354	56556	1.403	6.65	0.97680786
20	0.15	20660.855	4462	56558	1.403	7	0.974044394
21	0.15	20639.939	4139	56543	1.403	7.35	0.973058321
22	0.15	20658.861	4215	56574	1.403	7.7	0.973950388
23	0.15	20669.06	4379	56474	1.403	8.05	0.974431214
24	0.15	20893.119	4384	56434	1.403	8.4	0.98499435
25	0.15	21266.962	4447	56544	1.403	8.75	1.002618968
26	0.15	22409.168	4383	56566	1.403	9.1	1.056467628
27	0.15	24065.229	4709	56647	1.403	9.45	1.134541692
28	0.15	25712.036	4712	56972	1.403	9.8	1.212179483
29	0.15	26998.391	4751	57412	1.403	10.15	1.272823966
30	0.15	27831.753	4845	57914	1.403	10.5	1.312112349
31	0.15	28381.869	4957	58152	1.403	10.85	1.338047259
32	0.15	28712.288	4867	58415	1.403	11.2	1.353624677
33	0.15	28949.533	4982	58483	1.403	11.55	1.364809459
34	0.15	28839.636	5034	58532	1.403	11.9	1.359628426
35	0.15	28886.642	4965	58521	1.403	12.25	1.361844498
36	0.15	28787.654	5257	58619	1.403	12.6	1.357177764
37	0.15	28681.873	4991	58582	1.403	12.95	1.352190778
38	0.15	28484.42	5083	58520	1.403	13.3	1.342881968
39	0.15	28359.096	4987	58606	1.403	13.65	1.336973638
40	0.15	28146.029	5134	58608	1.403	14	1.326928714
41	0.15	27864.4	4949	58517	1.403	14.35	1.313651473
42	0.15	27609.429	5010	58353	1.403	14.7	1.301631009
43	0.15	27408.59	4932	58341	1.403	15.05	1.292162567
44	0.15	27219.682	4969	58065	1.403	15.4	1.283256606
45	0.15	27048.204	5026	58196	1.403	15.75	1.275172372
46	0.15	26809.65	5020	57953	1.403	16.1	1.263925878
47	0.15	26626.798	4911	57823	1.403	16.45	1.255305423
48	0.15	26408.231	4850	57850	1.403	16.8	1.245001205
49	0.15	26238.399	4726	57769	1.403	17.15	1.23699457
50	0.15	26102.588	4755	57635	1.403	17.5	1.230591837
51	0.15	25933.342	4883	57457	1.403	17.85	1.22261283
52	0.15	25699.999	4691	57288	1.403	18.2	1.211612005
53	0.15	25587.339	4815	57261	1.403	18.55	1.206300713
54	0.15	25386.801	4587	57164	1.403	18.9	1.196846461
55	0.15	25151.748	4590	56996	1.403	19.25	1.18576502
56	0.15	24995.367	4847	56869	1.403	19.6	1.178392526
57	0.15	24761.749	4750	56708	1.403	19.95	1.167378736
58	0.15	24646.823	4531	56780	1.403	20.3	1.161960615
59	0.15	24550.424	4789	56720	1.403	20.65	1.157415938
60	0.15	24327.091	4748	56740	1.403	21	1.146887029
61	0.15	24140.222	4705	56686	1.403	21.35	1.138077195
62	0.15	24022.973	4822	56675	1.403	21.7	1.132549557
63	0.15	23932.714	4713	56674	1.403	22.05	1.128294347
64	0.15	23688.608	4682	56624	1.403	22.4	1.116786107
65	0.15	23583.226	4707	56615	1.403	22.75	1.111817932
66	0.15	23473.775	4624	56543	1.403	23.1	1.106657926
67	0.15	23313.356	4639	56590	1.403	23.45	1.099095063
68	0.15	23211.627	4672	56531	1.403	23.8	1.094299106
69	0.15	23098.5	4527	56505	1.403	24.15	1.088965797
70	0.15	22959.784	4454	56614	1.403	24.5	1.082426109
71	0.15	22813.55	4501	56510	1.403	24.85	1.07553199
72	0.15	22740.997	4353	56602	1.403	25.2	1.072111519
73	0.15	22620.318	4632	56570	1.403	25.55	1.066422176
74	0.15	22513.782	4475	56474	1.403	25.9	1.061399596
75	0.15	22365.942	4507	56532	1.403	26.25	1.054429762
76	0.15	22296.734	4410	56613	1.403	26.6	1.05116699
77	0.15	22186.964	4726	56516	1.403	26.95	1.045991945
78	0.15	22072.693	4542	56466	1.403	27.3	1.040604703
79	0.15	21989.996	4553	56455	1.403	27.65	1.036705999
80	0.15	21840.384	4568	56407	1.403	28	1.029652626
81	0.15	21811.972	4732	56330	1.403	28.35	1.028313158
82	0.15	21740.139	4567	56399	1.403	28.7	1.024926631
83	0.15	21569.71	4568	56230	1.403	29.05	1.016891852
84	0.15	21495.559	4414	56218	1.403	29.4	1.013396045
85	0.15	21437.363	4539	56344	1.403	29.75	1.010652427
86	0.15	21287.631	4526	56285	1.403	30.1	1.003593396
87	0.15	21243.721	4485	56228	1.403	30.45	1.001523284
88	0.15	21113.511	4496	56187	1.403	30.8	0.995384607
89	0.15	20870.075	4306	56203	1.403	31.15	0.983907953
90	0.15	20796.293	4460	56206	1.403	31.5	0.980429542
91	0.15	20762	4531	56218	1.403	31.85	0.978812818
92	0.15	20662.117	4448	56196	1.403	32.2	0.97410389
93	0.15	20558.484	4479	56186	1.403	32.55	0.969218171
94	0.15	20402.014	4413	56094	1.403	32.9	0.961841481
95	0.15	20304.273	4156	56113	1.403	33.25	0.957233536
96	0.15	20226.437	4432	56122	1.403	33.6	0.953564002
97	0.15	20139.713	4373	56148	1.403	33.95	0.949475447
98	0.15	20052.117	4455	56163	1.403	34.3	0.945345783
99	0.15	19975.915	4393	56136	1.403	34.65	0.941753283
100	0.15	19883.574	4351	56163	1.403	35	0.937399918
101	0.15	19838.12	4312	56085	1.403	35.35	0.935257015
102	0.15	19831.54	4053	56046	1.403	35.7	0.934946805
103	0.15	19651.761	4154	56088	1.403	36.05	0.926471225
104	0.15	19626.134	4154	56083	1.403	36.4	0.925263054
105	0.15	19592.604	4415	56007	1.403	36.75	0.923682301
106	0.15	19509.617	4269	55977	1.403	37.1	0.919769926
107	0.15	19435.831	4290	56004	1.403	37.45	0.916291326
108	0.15	19373.846	4193	56002	1.403	37.8	0.913369078
109	0.15	19320.162	4082	56015	1.403	38.15	0.910838176
110	0.15	19180.069	4417	55991	1.403	38.5	0.904233571
111	0.15	19113.918	4331	56029	1.403	38.85	0.901114919
112	0.15	19055.219	4314	55977	1.403	39.2	0.898347587
113	0.15	19010.279	4261	56011	1.403	39.55	0.896228916
114	0.15	18910.129	4128	55983	1.403	39.9	0.891507401
115	0.15	18850.596	4315	55916	1.403	40.25	0.888700751
116	0.15	18774.486	4248	55976	1.403	40.6	0.885112588
117	0.15	18686.235	4244	55874	1.403	40.95	0.880952044
118	0.15	18670.288	4093	55854	1.403	41.3	0.880200232
119	0.15	18568.492	4041	55860	1.403	41.65	0.875401117
120	0.15	18526.85	4354	55859	1.403	42	0.873437928
121	0.15	18472.691	4367	55682	1.403	42.35	0.870884632
122	0.15	18407.717	4265	55778	1.403	42.7	0.86782147
123	0.15	18333.092	4199	55642	1.403	43.05	0.864303316
124	0.15	18363.644	4318	55643	1.403	43.4	0.865743673
125	0.15	18277.84	4389	55784	1.403	43.75	0.861698492
126	0.15	18215.178	4167	55775	1.403	44.1	0.858744327
127	0.15	18149.209	4236	55598	1.403	44.45	0.855634255
128	0.15	17976.92	4338	55620	1.403	44.8	0.847511787
129	0.15	17968.548	4366	55589	1.403	45.15	0.847117094
130	0.15	17903.694	4333	55587	1.403	45.5	0.844059589
131	0.15	17842.025	4310	55633	1.403	45.85	0.841152238
132	0.15	17848.596	4264	55627	1.403	46.2	0.841462024
133	0.15	17785.365	4277	55628	1.403	46.55	0.838481034
134	0.15	17705.63	4253	55632	1.403	46.9	0.834721973
135	0.15	17698.709	3855	55614	1.403	47.25	0.834395686
136	0.15	17655.289	4195	55633	1.403	47.6	0.832348675
137	0.15	17522.02	4329	55620	1.403	47.95	0.826065783
138	0.15	17518.029	4295	55608	1.403	48.3	0.825877629
139	0.15	17467.619	4225	55620	1.403	48.65	0.823501078
140	0.15	17385.767	4062	55580	1.403	49	0.819642211
141	0.15	17305.714	4232	55563	1.403	49.35	0.815868158
142	0.15	17281.688	4286	55608	1.403	49.7	0.814735465
143	0.15	17197.669	4057	55602	1.403	50.05	0.810774437
144	0.15	17132.687	4258	55565	1.403	50.4	0.807710897
145	0.15	17117.139	4126	55539	1.403	50.75	0.806977895
146	0.15	17019.874	4318	55592	1.403	51.1	0.802392392
147	0.15	16979.617	3987	55616	1.403	51.45	0.800494498
148	0.15	16971.187	4309	55599	1.403	51.8	0.80009707
149	0.15	16946.181	4235	55593	1.403	52.15	0.798918177
150	0.15	16871.575	4278	55607	1.403	52.5	0.795400919
151	0.15	16809.059	4054	55600	1.403	52.85	0.792453637
152	0.15	16794.757	4172	55578	1.403	53.2	0.791779377
153	0.15	16722.166	4158	55578	1.403	53.55	0.788357115
154	0.15	16705.448	4270	55583	1.403	53.9	0.787568955
155	0.15	16666.003	3960	55541	1.403	54.25	0.785709342
156	0.15	16608.904	4108	55531	1.403	54.6	0.783017442
157	0.15	16538.296	4093	55514	1.403	54.95	0.779688668
158	0.15	16479.245	4148	55570	1.403	55.3	0.776904741
159	0.15	16449.133	4136	55551	1.403	55.65	0.775485128
160	0.15	16420.336	4222	55539	1.403	56	0.77412751
161	0.15	16372.661	4284	55509	1.403	56.35	0.771879899
162	0.15	16349.769	4189	55493	1.403	56.7	0.770800668
163	0.15	16299.124	4200	55540	1.403	57.05	0.768413038
164	0.15	16227.698	4133	55505	1.403	57.4	0.765045699
165	0.15	16174.84	3910	55445	1.403	57.75	0.762553739
166	0.15	16116.971	4033	55271	1.403	58.1	0.759825537
167	0.15	16091.761	4003	55242	1.403	58.45	0.758637026
168	0.15	16080.445	4158	55263	1.403	58.8	0.75810354
169	0.15	16042.247	4072	55296	1.403	59.15	0.756302716
170	0.15	15996.922	4079	55127	1.403	59.5	0.754165895
171	0.15	15963.338	4260	55136	1.403	59.85	0.752582596
172	0.15	15892.319	4033	55220	1.403	60.2	0.749234445
173	0.15	15868.972	4152	55203	1.403	60.55	0.748133764
174	0.15	15871.709	4041	55186	1.403	60.9	0.748262798
175	0.15	15774.861	4196	55124	1.403	61.25	0.743696954
176	0.15	15719.032	3652	55117	1.403	61.6	0.741064927
177	0.15	15675.724	4215	55313	1.403	61.95	0.739023196
178	0.15	15634.431	4114	55386	1.403	62.3	0.73707646
179	0.15	15611.46	4077	55317	1.403	62.65	0.735993505
180	0.15	15609.665	3978	55165	1.403	63	0.735908881
181	0.15	15560.491	4043	55118	1.403	63.35	0.733590601
182	0.15	15528.809	4084	55119	1.403	63.7	0.73209697
183	0.15	15424.403	4107	55043	1.403	64.05	0.727174808
184	0.15	15446.128	3980	55138	1.403	64.4	0.728199021
185	0.15	15428.49	3873	55151	1.403	64.75	0.727367488
186	0.15	15356.218	3972	55124	1.403	65.1	0.723960265
187	0.15	15277.212	4204	55142	1.403	65.45	0.720235571
188	0.15	15225.287	4195	55180	1.403	65.8	0.717787596
189	0.15	15218.93	3903	55169	1.403	66.15	0.717487899
190	0.15	15182.314	4095	55124	1.403	66.5	0.715761658
191	0.15	15190.326	4071	55123	1.403	66.85	0.71613938
192	0.15	15179.156	3951	55124	1.403	67.2	0.715612776
193	0.15	15176.694	3958	55215	1.403	67.55	0.715496707
194	0.15	15082.835	4150	55181	1.403	67.9	0.711071777
